# Supplementary material
Source: PubMed Central journal article supplement (PMC6450100)

**FIG S1. Inhibition of viral spread.** Effects of fusion inhibitors on the area of plaques formed by the MeV WT and L454W in infected Vero SLAM or Vero cells. The fusion inhibitor compounds (3G or HRC4) were added at the indicated concentration after the 90-min adsorption period. Pictures were taken 48 or 72 hours post infection (h.p.i).

WT 48 h.p.i.

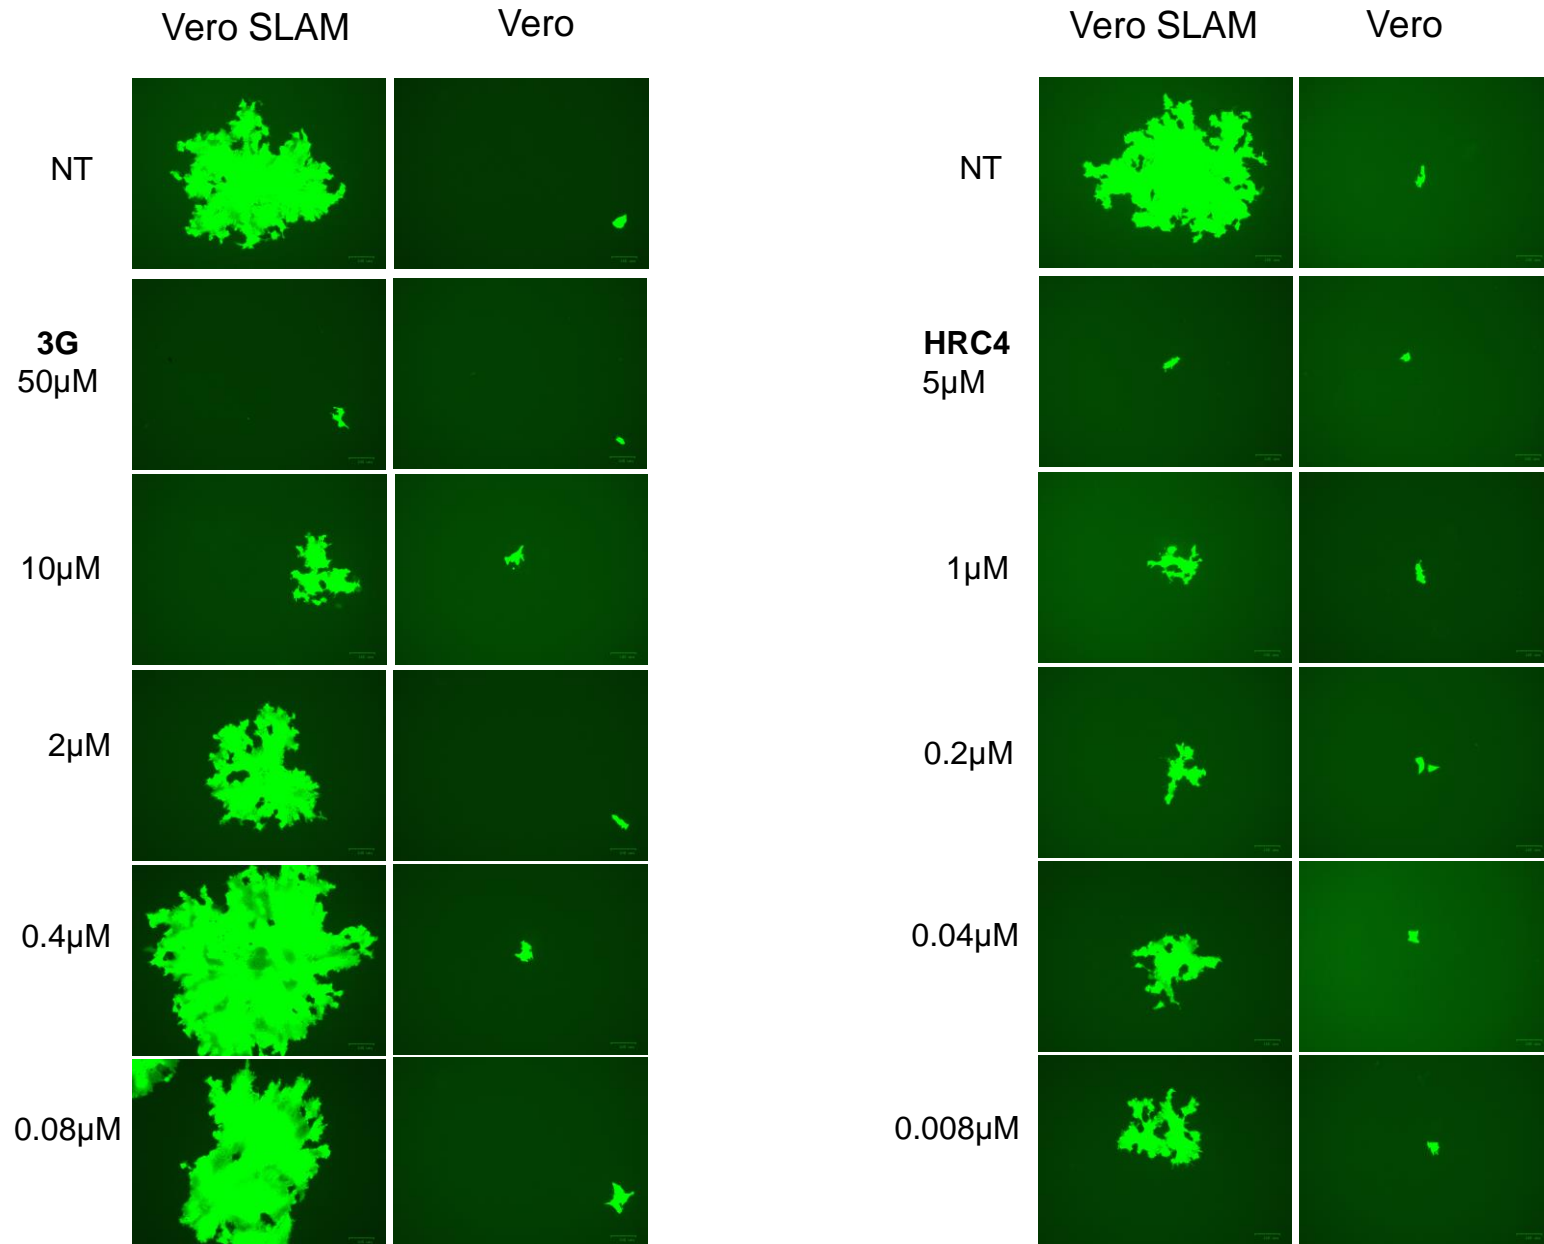

# L454W 48 h.p.i.

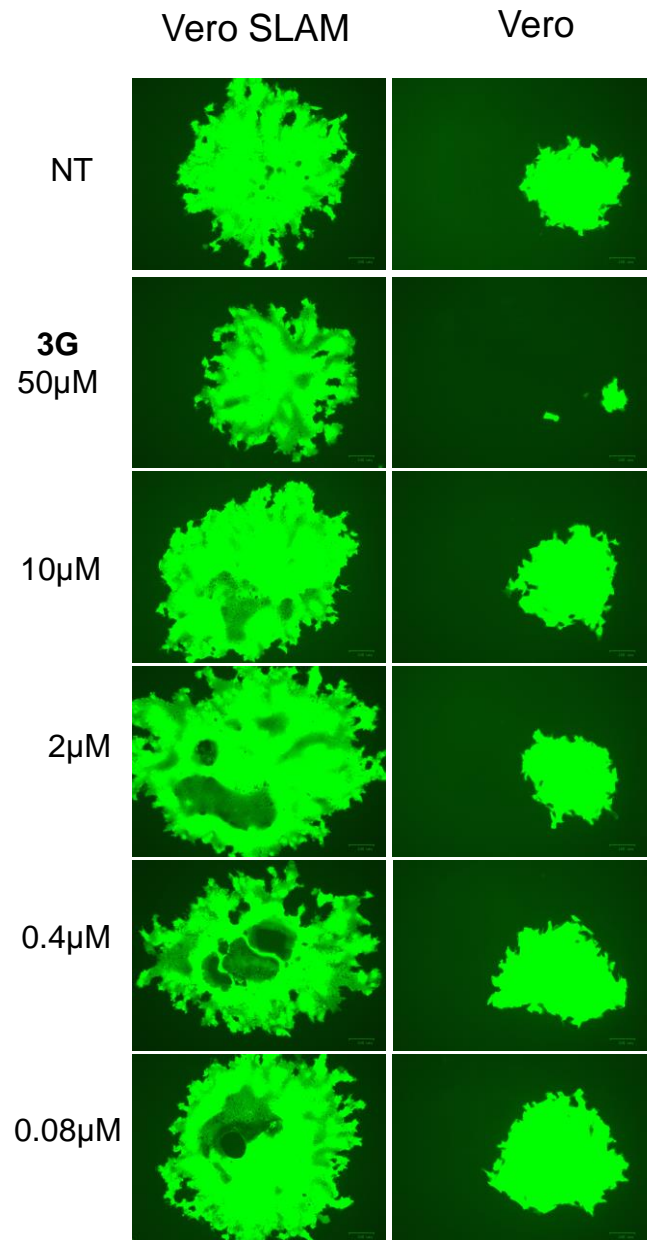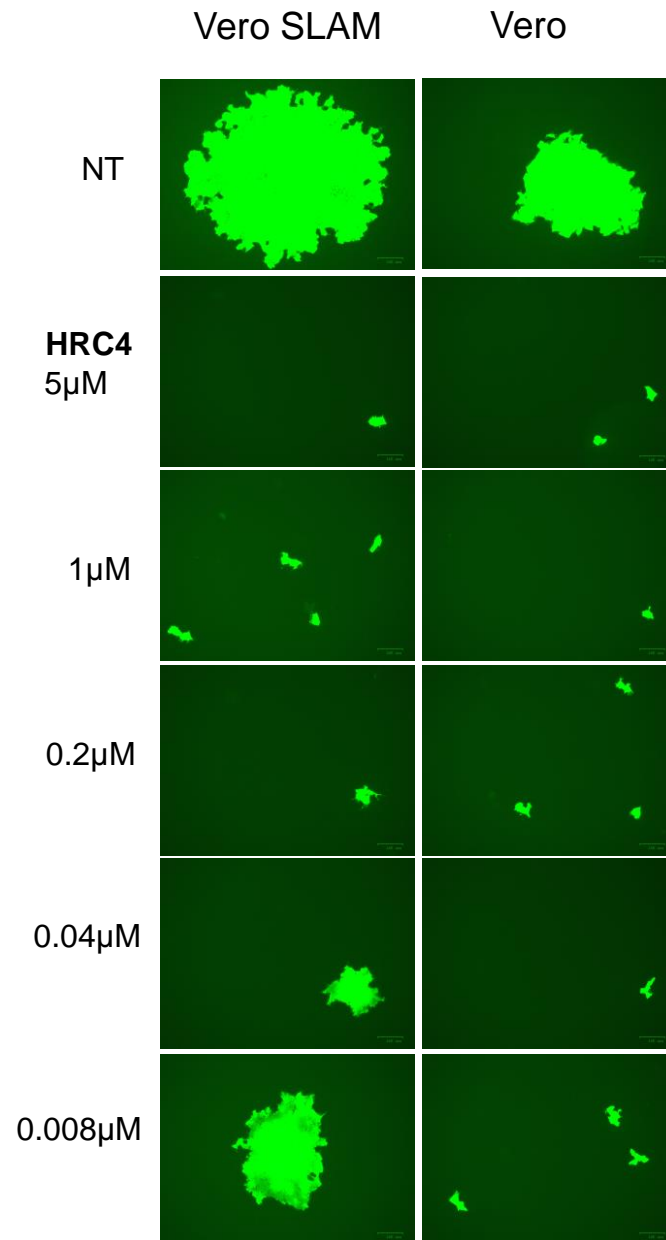

# WT 72 h.p.i.

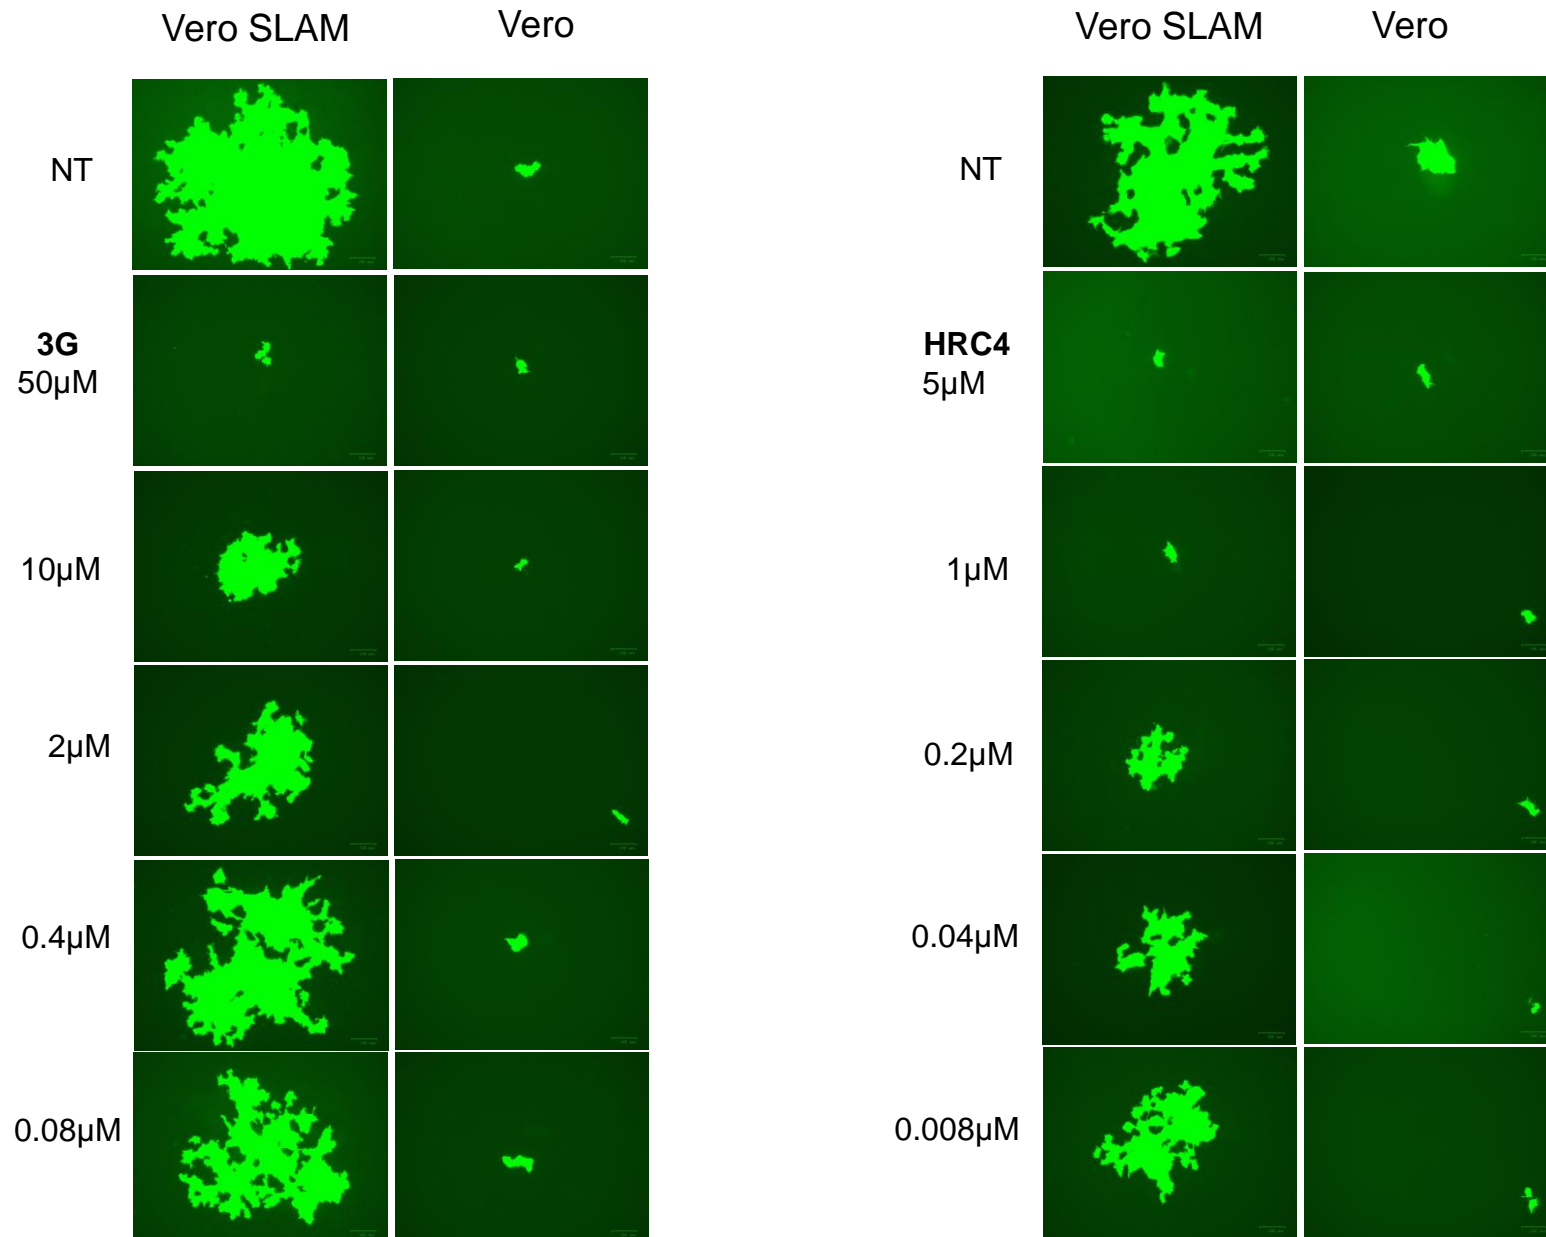

# L454W 72 h.p.i.

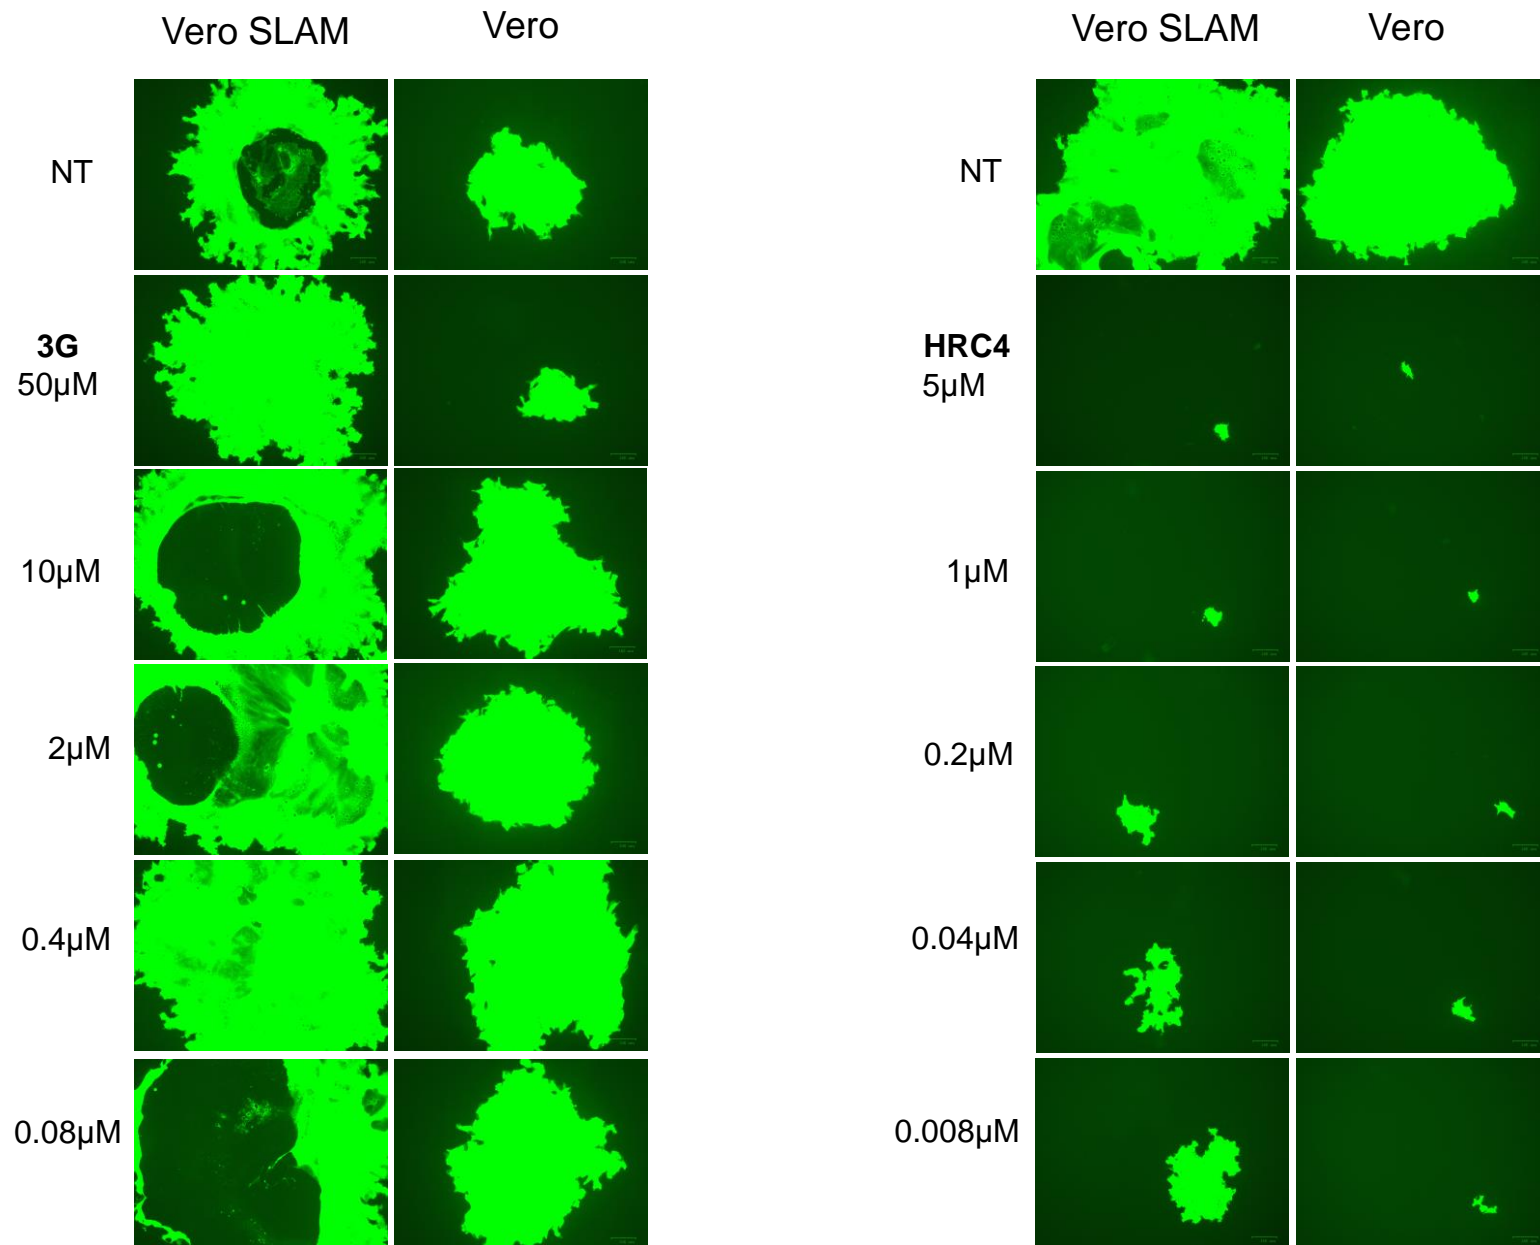

Supplement: JVI.01862-18-s0001.pdf [file JVI.01862-18-s0001.pdf]
